# Supplementary material for: Detection of Markers in Green Beans and Roasted Beans of Kalosi-Enrekang Arabica Coffee with Different Postharvest Processing Using LC-MS/MS
Source: Hindawi journal article supplement (doi:10.1155/2023/6696808), 2023-03-23
Supplement: f1 [file 6696808.f1.pdf]

Supplementary materials contain about identified of compounds in green beans and roasted beans Kalosi-Enrekang Arabica (% area relative) (Table 1), VIP predictive OPLS-DA modeling of identified compounds in green beans (A) and green beans (B) (Figure 1), and permutation test of green beans (A) dan roasted beans (B) (Figure 2).

Table 1 contains the classes of compounds and compounds identified in green beans and roasted beans Kalosi-Enrekang Arabica prepared with different postharvest processing and analyzed using LC-MS/MS.

Table 1. Identified of compounds in green beans and roasted beans Arabica Kalosi Enrekang (%relative)

| Compounds                             | Formula       | Error ppm | MW        | RT     | MS <sup>2</sup> | M/Z      | Postharvest   |               |               |               |               |               |
|---------------------------------------|---------------|-----------|-----------|--------|-----------------|----------|---------------|---------------|---------------|---------------|---------------|---------------|
|                                       |               |           |           |        |                 |          | Green beans   |               |               | Roasted beans |               |               |
|                                       |               |           |           |        |                 |          | Natural       | Honey         | Fully washed  | Natural       | Honey         | Fully washed  |
| <b>Quinic Acid and Derivative</b>     |               |           |           |        |                 |          |               |               |               |               |               |               |
| 5 Feruloylquinic acid                 | C17 H20 O9    | -2.59     | 368.10978 | 8.147  | M+H             | 369.1163 | 3.550         | 3.073         | 3.223         | 1.801         | 1.719         | 1.751         |
| 3 Feruloylquinic acid                 | C17 H20 O9    | -2.29     | 368.10989 | 6.644  | M+H             | 369.1163 | 0.153         | 0.109         | 0.123         | 0.187         | 0.188         | 0.179         |
| 4 Feruloylquinic acid                 | C17 H20 O9    | -2.34     | 368.10987 | 9.105  | M+H             | 369.1163 | 0.036         | 0.055         | 0.043         | 0.008         | 0.008         | 0.006         |
| 5 Caffeoylquinic acids                | C16 H18 O9    | -2.83     | 354.09408 | 6.359  | M+H             | 355.1017 | 13.590        | 9.141         | 11.607        | 4.603         | 4.771         | 4.221         |
| 4 Caffeoylquinic acids                | C16 H18 O9    | -2.61     | 354.09416 | 6.819  | M+H             | 355.1017 | 2.707         | 3.744         | 4.003         | 1.947         | 2.377         | 2.327         |
| 3 Caffeoylquinic acids                | C16 H18 O9    | -3.16     | 354.09396 | 4.983  | M+H             | 355.1017 | 1.492         | 2.315         | 2.200         | 0.933         | 0.983         | 1.762         |
| D-(-)-Quinic acid                     | C7 H12 O6     | -4.92     | 192.06244 | 1.102  | M+H             | 193.0341 | 0.236         | 0.247         | 0.236         | 0.016         | 0.091         | 0.014         |
| 4-O-p-coumaroylquinic acid            | C16 H18 O8    | -2.55     | 338.09931 | 7.631  | M+H             | 339.1066 | 0.632         | 0.459         | 0.544         | 0.269         | 0.227         | 0.227         |
| 5-O-p-coumaroylquinic acid            | C16 H18 O8    | -1.28     | 338.09973 | 5.96   | M+H             | 339.1068 | 0.025         | 0.016         | 0.018         | 0.025         | 0.024         | 0.025         |
| 3-O-p-coumaroylquinic acid            | C16 H18 O8    | -1.08     | 338.0998  | 5.785  | M+H             | 339.1067 | 0.021         | 0.012         | 0.009         | 0.021         | 0.010         | 0.010         |
| 3,5-Dicaffeoylquinic acid             | C25 H24 O12   | -2.13     | 516.12568 | 9.83   | M-H             | 515.1187 | 0.715         | 0.738         | 0.697         | 0.217         | 0.295         | 0.216         |
| 4,5-Dicaffeoylquinic acid             | C25 H24 O12   | -2.18     | 516.12565 | 10.701 | M-H             | 515.1187 | 0.597         | 0.548         | 0.536         | 0.175         | 0.238         | 0.171         |
| 3,4-Dicaffeoylquinic acid             | C25 H24 O12   | -1.88     | 516.12581 | 8.302  | M-H             | 515.1186 | nd            | nd            | nd            | 0.031         | 0.023         | 0.029         |
| 1,4-Di-O-caffeoylquinic acid          | C25 H24 O12   | -1.82     | 516.12584 | 7.146  | M+H             | 517.1332 | nd            | nd            | nd            | 0.011         | nd            | 0.011         |
| <b>Total</b>                          |               |           |           |        |                 |          | <b>23.752</b> | <b>20.456</b> | <b>23.240</b> | <b>10.244</b> | <b>10.953</b> | <b>10.949</b> |
| <b>Cinnamic acids and derivatives</b> |               |           |           |        |                 |          |               |               |               |               |               |               |
| 4-Coumaroyl-2-hydroxyputrescine       | C13 H18 N2 O3 | -1.79     | 250.1313  | 7.459  | M+H             | 251.1639 | 0.014         | 0.009         | 0.014         | nd            | nd            | nd            |
| (E)-p-coumaric acid                   | C9 H8 O3      | -0.56     | 164.04725 | 1.74   | M+H             | 165.0606 | 0.012         | 0.058         | 0.012         | 0.025         | 0.016         | 0.027         |
| (E)-Ferulic acid                      | C10 H10 O4    | -1.97     | 194.05753 | 4.985  | M-H             | 193.0498 | 0.050         | 0.013         | 0.077         | 0.080         | 0.078         | 0.081         |
| alpha-Terpinyl cinnamate              | C19 H24 O2    | -2.03     | 284.17705 | 9.685  | M+H             | 285.1837 | 0.018         | 0.015         | 0.015         | 0.117         | 0.111         | 0.098         |

| Compounds                                      | Formula       | Error ppm | MW        | RT     | MS <sup>2</sup> | M/Z      | Postharvest  |              |              |               |              |              |
|------------------------------------------------|---------------|-----------|-----------|--------|-----------------|----------|--------------|--------------|--------------|---------------|--------------|--------------|
|                                                |               |           |           |        |                 |          | Green beans  |              |              | Roasted beans |              |              |
|                                                |               |           |           |        |                 |          | Natural      | Honey        | Fully washed | Natural       | Honey        | Fully washed |
| Caffeic acid                                   | C9 H8 O4      | -4.28     | 180.04149 | 6.953  | M-H             | 179.0840 | 0.171        | 0.095        | 0.087        | 0.017         | 0.013        | 0.014        |
| Cinnamic acid                                  | C9 H8 O2      | -1.19     | 148.05225 | 8.135  | M+H             | 149.0595 | 0.025        | 0.022        | 0.022        | 0.026         | 0.024        | 0.025        |
| 5-Hydroxyferulic acid                          | C10 H10 O5    | -3.05     | 210.05218 | 7.887  | M+H             | 211.0824 | 0.017        | 0.017        | nd           | nd            | nd           | nd           |
| Ferulic acid                                   | C10 H10 O4    | -3.87     | 194.05716 | 10.544 | M-H             | 193.0496 | 0.011        | 0.009        | 0.013        | 0.113         | 0.086        | 0.110        |
| 4-Coumaroylputrescine                          | C13 H18 N2 O2 | -2.56     | 234.13623 | 5.759  | M+H             | 235.1689 | 0.050        | 0.039        | 0.043        | nd            | nd           | nd           |
| Sinapoylputrescine                             | C15 H22 N2 O4 | -1.43     | 294.15754 | 3.508  | M+H             | 295.1644 | nd           | 0.008        | nd           | nd            | 0.009        | 0.006        |
| Sinapic acid                                   | C11 H12 O5    | -2.14     | 224.06799 | 7.382  | M+H             | 225.0753 | nd           | nd           | nd           | 0.019         | 0.015        | 0.016        |
| 2-O-(E-p-Hydroxycinnamoyl)-(x)-glyceric acid   | C12 H12 O6    | -2.9      | 252.06266 | 10.657 | M+H             | 253.0698 | nd           | nd           | nd           | 0.063         | 0.051        | 0.066        |
| N-trans-p-Coumaroyloctopamine                  | C17 H17 N O4  | -2.51     | 299.11501 | 7.208  | M+H             | 300.1225 | nd           | nd           | nd           | 0.011         | 0.008        | nd           |
| caffeoylshikimate                              | C16 H16 O8    | -2.69     | 336.08361 | 7.939  | M-H             | 335.0766 | nd           | nd           | nd           | 0.688         | 0.610        | 0.673        |
| 3-O-Caffeoylshikimic acid                      | C16 H16 O8    | -2.35     | 336.08373 | 8.481  | M-H             | 335.0766 | nd           | nd           | nd           | 0.449         | 0.401        | 0.452        |
| 4-O-Caffeoylshikimic acid                      | C16 H16 O8    | -3.63     | 336.0833  | 8.124  | M-H             | 335.0767 | nd           | nd           | nd           | 0.162         | 0.122        | nd           |
| 3-Coumaric acid                                | C9 H8 O3      | -6.16     | 164.04633 | 7.149  | M-H             | 163.0391 | nd           | nd           | nd           | 0.010         | 0.008        | nd           |
| (E)-4-Methoxycinnamic acid                     | C10 H10 O3    | -2.58     | 178.06253 | 8.373  | M-H             | 177.0549 | nd           | nd           | nd           | 0.011         | 0.006        | 0.027        |
| (E)-3,4,5-Trimethoxycinnamic acid              | C12 H14 O5    | -2.85     | 238.08344 | 8.877  | M+H             | 239.0883 | nd           | nd           | nd           | 0.013         | 0.013        | 0.012        |
| 4-coumaroylshikimic acid                       | C16 H16 O7    | -1.56     | 320.0891  | 8.994  | M-H             | 319.0819 | nd           | nd           | nd           | nd            | 0.012        | 0.017        |
| 1-O-2'-Hydroxy-4'-methoxycinnamoyl-b-D-glucose | C16 H20 O9    | -1.93     | 356.11004 | 6.526  | M+H             | 357.2027 | nd           | nd           | nd           | nd            | nd           | nd           |
| 3,4-Dimethoxy-cinnamic acid                    | C11 H12 O4    | -1.78     | 208.07319 | 8.243  | M+H             | 209.0805 | 0.055        | 0.004        | 0.038        | 0.052         | 0.045        | 0.043        |
| <b>Total</b>                                   |               |           |           |        |                 |          | <b>0.424</b> | <b>0.288</b> | <b>0.321</b> | <b>1.855</b>  | <b>1.629</b> | <b>1.668</b> |
| <b>Coumarins and derivatives</b>               |               |           |           |        |                 |          |              |              |              |               |              |              |
| 4-Hydroxy-2H-1-benzopyran-2-one                | C9 H6 O3      | -2.87     | 162.03123 | 6.38   | M+H             | 163.0384 | 1.719        | 1.657        | 1.771        | 0.944         | 1.160        | 0.951        |
| Coumarin                                       | C9 H6 O2      | -2.4      | 146.03643 | 7.639  | M+H             | 147.0438 | 0.092        | 0.070        | 0.086        | 0.054         | 0.048        | 0.055        |
| 8-methoxycoumarin                              | C10 H8 O3     | -3.43     | 176.04674 | 8.155  | M+H             | 177.0540 | 0.700        | 0.600        | 0.623        | 0.440         | 0.389        | 0.426        |
| 3 Hydroxycoumarin                              | C9 H6 O3      | -3.12     | 162.03119 | 4.993  | M+H             | 163.0385 | nd           | nd           | 0.208        | 0.074         | 0.067        | 0.076        |
| 7-Ethoxycoumarin                               | C11 H10 O3    | -1.41     | 190.06273 | 12.504 | M+H             | 191.0701 | nd           | nd           | 0.006        | nd            | nd           | nd           |
| Scopoletin                                     | C10 H8 O4     | -2.03     | 192.04187 | 7.442  | M+H             | 193.0491 | nd           | nd           | nd           | 0.060         | 0.042        | 0.053        |
| Scoparone                                      | C11 H10 O4    | -4.03     | 206.05708 | 12.918 | M+H             | 207.0643 | nd           | nd           | nd           | 0.070         | 0.045        | 0.065        |

| Compounds                                   | Formula       | Error ppm | MW        | RT     | MS <sup>2</sup> | M/Z      | Postharvest  |              |              |               |              |              |
|---------------------------------------------|---------------|-----------|-----------|--------|-----------------|----------|--------------|--------------|--------------|---------------|--------------|--------------|
|                                             |               |           |           |        |                 |          | Green beans  |              |              | Roasted beans |              |              |
|                                             |               |           |           |        |                 |          | Natural      | Honey        | Fully washed | Natural       | Honey        | Fully washed |
| 7-Ethoxy-4-methyl-2H-1-benzopyran-2-one     | C12 H12 O3    | -3.91     | 204.07785 | 8.686  | M+H             | 205.0858 | nd           | nd           | nd           | 0.009         | 0.006        | 0.010        |
| 4-Methylumbelliferyl acetate                | C12 H10 O4    | -2.54     | 218.05736 | 11.181 | M-H             | 217.0500 | nd           | nd           | nd           | nd            | 0.007        | 0.009        |
| <b>Total</b>                                |               |           |           |        |                 |          | <b>2.511</b> | <b>2.327</b> | <b>2.694</b> | <b>1.651</b>  | <b>1.763</b> | <b>1.644</b> |
| <b>Amino acids, peptides, and analogues</b> |               |           |           |        |                 |          |              |              |              |               |              |              |
| N-feruloylglycine                           | C12 H13 N O5  | -1.71     | 251.07894 | 6.998  | M-H             | 250.0715 | 0.045        | 0.038        | 0.046        | nd            | 0.007        | nd           |
| N-Acetyl-L-phenylalanine                    | C11 H13 N O3  | -1.56     | 207.08922 | 6.818  | M+H             | 208.0962 | 0.025        | 0.027        | 0.024        | 0.032         | 0.030        | 0.032        |
| N-Acetyl-L-leucine                          | C8 H15 N O3   | -2.57     | 173.10475 | 8.359  | M+H             | 174.1122 | 0.016        | 0.013        | 0.174        | 0.018         | 0.014        | 0.005        |
| Na-p-Hydroxycoumaroyltryptophan             | C20 H18 N2 O4 | -3.39     | 350.12547 | 12.356 | M+H             | 351.1324 | 0.212        | 0.215        | 0.456        | 0.072         | 0.092        | 0.061        |
| N-Caffeoyltryptophan                        | C20 H18 N2 O5 | -3.33     | 366.12035 | 11.646 | M+H             | 367.1273 | 0.581        | 0.663        | nd           | 0.227         | nd           | nd           |
| Leucylproline                               | C11 H20 N2 O3 | -1.74     | 228.147   | 5.64   | M+H             | 229.1803 | 0.048        | 0.042        | nd           | nd            | nd           | nd           |
| Leu-Leu                                     | C12 H24 N2 O3 | -1.6      | 244.1783  | 7.321  | M+H             | 245.0781 | 0.006        | 0.007        | nd           | nd            | nd           | nd           |
| L-Valine                                    | C5 H11 N O2   | -1.15     | 117.07884 | 1.195  | M+H             | 118.0863 | 0.391        | 0.336        | 0.292        | 0.020         | nd           | nd           |
| L-Tyrosine                                  | C9 H11 N O3   | -2.77     | 181.07339 | 1.725  | M+H             | 182.0806 | 0.162        | 0.141        | 0.130        | 0.172         | 0.193        | 0.138        |
| L-Theanine                                  | C7 H14 N2 O3  | -0.88     | 174.10029 | 1.154  | M+H             | 175.0863 | 0.019        | 0.023        | 0.016        | nd            | nd           | nd           |
| L-Pyroglutamic acid                         | C5 H7 N O3    | -0.88     | 129.04248 | 1.564  | M-H             | 128.0343 | 0.013        | 0.011        | 0.011        | nd            | 0.040        | nd           |
| L-Phenylalanine                             | C9 H11 N O2   | -2.53     | 165.07856 | 3.356  | M+H             | 166.0858 | 1.498        | 1.047        | 1.293        | 0.070         | 0.055        | 0.048        |
| L-Isoleucine                                | C6 H13 N O2   | -1.95     | 131.09437 | 1.866  | M+H             | 132.1017 | 1.630        | 1.629        | 1.112        | nd            | nd           | nd           |
| L-(-)-Methionine                            | C5 H11 N O2 S | -2.25     | 149.05071 | 1.346  | M+H             | 150.1123 | 0.141        | 0.109        | 0.065        | nd            | nd           | nd           |
| L-(-)-Asparagine                            | C4 H8 N2 O3   | -0.94     | 132.05337 | 1.188  | M-H             | 133.0131 | 0.033        | 0.053        | 0.043        | nd            | nd           | nd           |
| L-(+)-Arginine                              | C6 H14 N4 O2  | -1.31     | 174.11145 | 1.151  | M+H             | 174.9753 | 0.065        | 0.064        | 0.050        | nd            | nd           | nd           |
| L-(+)-Alanine                               | C3 H7 N O2    | 2.72      | 89.04792  | 1.171  | M+H             | 90.0916  | 0.057        | 0.060        | 0.084        | nd            | nd           | nd           |
| gamma-Aminobutyric acid                     | C4 H9 N O2    | 0.72      | 103.0634  | 1.108  | M+H             | 104.0344 | 0.750        | 0.767        | 0.469        | nd            | nd           | nd           |
| DL-Lysine                                   | C6 H14 N2 O2  | -1.33     | 146.10533 | 1.13   | M-H             | 147.0653 | 0.041        | nd           | nd           | nd            | nd           | nd           |
| DL-Histidine                                | C6 H9 N3 O2   | -1.09     | 155.06931 | 1.167  | M+H             | 155.1062 | 0.023        | 0.026        | 0.025        | nd            | nd           | nd           |
| DL-Glutamic acid                            | C5 H9 N O4    | -2.21     | 147.05283 | 1.175  | M-H             | 146.9821 | 0.100        | 0.107        | 0.188        | nd            | nd           | nd           |
| D-(+)-Tryptophan                            | C11 H12 N2 O2 | -2.86     | 204.08929 | 5.09   | M+H             | 205.0968 | 0.815        | 0.860        | 0.823        | 0.010         | 0.018        | 0.011        |
| D-(+)-Proline                               | C5 H9 N O2    | -0.27     | 115.0633  | 1.138  | M+H             | 116.0706 | 0.383        | 0.373        | 0.298        | nd            | nd           | nd           |
| Ala-Pro                                     | C8 H14 N2 O3  | -2.09     | 186.10005 | 1.166  | M+H             | 187.0077 | 0.005        | nd           | nd           | nd            | nd           | nd           |

| Compounds                                                | Formula       | Error ppm | MW        | RT    | MS <sup>2</sup> | M/Z      | Postharvest  |              |              |               |              |              |
|----------------------------------------------------------|---------------|-----------|-----------|-------|-----------------|----------|--------------|--------------|--------------|---------------|--------------|--------------|
|                                                          |               |           |           |       |                 |          | Green beans  |              |              | Roasted beans |              |              |
|                                                          |               |           |           |       |                 |          | Natural      | Honey        | Fully washed | Natural       | Honey        | Fully washed |
| Leucyl-phenylalanine                                     | C15 H22 N2 O3 | -0.99     | 278.16277 | 9.06  | M+H             | 279.1589 | nd           | 0.004        | nd           | nd            | nd           | nd           |
| L-arogenate                                              | C10 H13 N O5  | -1.35     | 227.07907 | 7.91  | M+H             | 228.2319 | 0.018        | 0.016        | 0.014        | nd            | nd           | nd           |
| L-Isoleucyl-L-proline                                    | C11 H20 N2 O3 | -2.03     | 228.14693 | 1.172 | M+H             | 229.0542 | nd           | 0.007        | 0.008        | nd            | nd           | nd           |
| Cyclo(leucylprolyl)                                      | C11 H18 N2 O2 | -1.16     | 210.13658 | 8.855 | M+H             | 211.0824 | 0.024        | 0.014        | nd           | nd            | nd           | nd           |
| 1-[(3-Carboxypropyl)amino]-1-deoxy-beta-D-fructofuranose | C10 H19 N O7  | -0.4      | 265.11604 | 1.111 | M-H             | 264.0874 | nd           | 0.016        | nd           | nd            | nd           | nd           |
| N-(1-Deoxy-1-fructosyl)leucine                           | C12 H23 N O7  | -0.95     | 293.14717 | 2.154 | M+H             | 294.2058 | 0.046        | 0.023        | nd           | nd            | nd           | nd           |
| Z-Leu-OH                                                 | C14 H19 N O4  | -2.72     | 265.13069 | 4.878 | M+H             | 266.1380 | nd           | nd           | nd           | 0.043         | 0.033        | 0.038        |
| N-Benzoylaspartic acid                                   | C11 H11 N O5  | -2.06     | 237.06323 | 4.184 | M+H             | 238.0703 | nd           | nd           | nd           | 0.009         | nd           | 0.019        |
| N-Acetylvanylalanine                                     | C12 H15 N O5  | -2.55     | 253.09438 | 5.871 | M+H             | 254.1017 | nd           | nd           | nd           | 0.088         | 0.065        | 0.076        |
| N-Acetyl-L-cysteine                                      | C5 H9 N O3 S  | -2.66     | 163.02988 | 6.691 | M+H             | 164.0372 | nd           | nd           | nd           | 0.027         | 0.029        | 0.024        |
| N-Acetyl-DL-tryptophan                                   | C13 H14 N2 O3 | -2.21     | 246.0999  | 9.191 | M+H             | 247.1072 | nd           | nd           | nd           | 0.026         | 0.030        | 0.029        |
| (3xi,6xi)-Cyclo(alanylvalyl)                             | C8 H14 N2 O2  | -1.57     | 170.10526 | 2.025 | M+H             | 171.1125 | nd           | nd           | nd           | 0.012         | 0.011        | nd           |
| L-(+)-Cysteine                                           | C3 H7 N O2 S  | -0.78     | 121.01966 | 6.695 | M+H             | 122.0269 | nd           | nd           | nd           | 0.008         | 0.008        | 0.007        |
| Indole-3-acetyl-valine                                   | C15 H18 N2 O3 | -2.48     | 274.13106 | 5.974 | M-H             | 273.0338 | nd           | nd           | nd           | 0.019         | nd           | nd           |
| 2-Aminoheptanedioic acid                                 | C7 H13 N O4   | -1.65     | 175.08417 | 4.544 | M+H             | 176.0103 | nd           | nd           | nd           | nd            | nd           | 0.005        |
| Caffeoyl tyrosine                                        | C18 H17 N O6  | -1.99     | 343.10491 | 9.31  | M+H             | 344.2248 | 0.005        | 0.006        | nd           | nd            | nd           | nd           |
| <b>Total</b>                                             |               |           |           |       |                 |          | <b>7.151</b> | <b>6.696</b> | <b>5.622</b> | <b>0.853</b>  | <b>0.625</b> | <b>0.494</b> |
| <b>Organoheterocyclic compounds</b>                      |               |           |           |       |                 |          |              |              |              |               |              |              |
| Tryptamine                                               | C10 H12 N2    | -2.8      | 160.0996  | 5.478 | M+H             | 161.0594 | 0.069        | 0.147        | 0.028        | nd            | nd           | nd           |
| Serotonin                                                | C10 H12 N2 O  | -2.96     | 176.09444 | 2.631 | M+H             | 177.1019 | 0.095        | 0.099        | 0.048        | 0.024         | 0.022        | 0.013        |
| trans-Zeatin                                             | C10 H13 N5 O  | -3.6      | 219.11122 | 1.868 | M+H             | 220.1184 | 0.306        | 0.345        | 0.318        | 0.213         | 0.258        | 0.211        |
| 1,3,7-Trimethyluric acid                                 | C8 H10 N4 O3  | -1.53     | 210.07497 | 7.261 | M+H             | 211.0824 | 0.055        | nd           | 0.053        | nd            | nd           | nd           |
| Phthalide                                                | C8 H6 O2      | -1.3      | 134.0366  | 6.386 | M+H             | 135.0438 | 0.092        | 0.088        | 0.108        | 0.044         | 0.039        | 0.045        |
| Guanine                                                  | C5 H5 N5 O    | -1.96     | 151.04911 | 1.357 | M+H             | 152.0561 | 0.015        | 0.028        | 0.019        | nd            | 0.024        | 0.019        |
| Nicotinic acid                                           | C6 H5 N O2    | -0.73     | 123.03194 | 1.416 | M+H             | 124.0391 | 0.023        | 0.021        | nd           | 0.241         | 0.203        | 0.232        |
| 6-Aminonicotinamide                                      | C6 H7 N3 O    | -1.79     | 137.05867 | 7.11  | M+H             | 138.0659 | 0.041        | nd           | 0.041        | 0.037         | 0.044        | 0.048        |
| Pyridoxine                                               | C8 H11 N O3   | -1.87     | 169.07358 | 1.226 | M+H             | 170.0808 | nd           | nd           | nd           | 0.053         | 0.058        | 0.027        |
| Pyridoxine phosphate                                     | C8 H12 N O6 P | -1.84     | 249.03977 | 7.315 | M+H             | 150.0470 | nd           | nd           | nd           | 0.008         | 0.009        | nd           |

| Compounds                                     | Formula       | Error ppm | MW        | RT     | MS <sup>2</sup> | M/Z      | Postharvest |       |              |               |       |              |
|-----------------------------------------------|---------------|-----------|-----------|--------|-----------------|----------|-------------|-------|--------------|---------------|-------|--------------|
|                                               |               |           |           |        |                 |          | Green beans |       |              | Roasted beans |       |              |
|                                               |               |           |           |        |                 |          | Natural     | Honey | Fully washed | Natural       | Honey | Fully washed |
| Pyridine                                      | C5 H5 N       | 3.78      | 79.0425   | 1.269  | M+H             | 80.0497  | nd          | nd    | nd           | 0.381         | 0.250 | 0.426        |
| 3-Propylpyridine                              | C8 H11 N      | -0.86     | 121.08905 | 1.174  | M+H             | 122.0964 | nd          | nd    | nd           | 0.016         | 0.012 | 0.022        |
| Nepetalactam                                  | C10 H15 N O   | -2.39     | 165.11497 | 5.951  | M+H             | 166.1222 | nd          | nd    | nd           | 0.066         | 0.044 | 0.058        |
| Nicotinamide                                  | C6 H6 N2 O    | -0.97     | 122.04789 | 1.638  | M+H             | 123.0552 | nd          | nd    | nd           | 0.039         | 0.037 | nd           |
| 2-Ethyl-5-methylpyridine                      | C8 H11 N      | -0.87     | 121.08904 | 1.758  | M+H             | 122.0963 | nd          | nd    | nd           | 0.092         | 0.060 | 0.108        |
| 2-Methylpyridine                              | C6 H7 N       | 1.68      | 93.05801  | 1.112  | M+H             | 94.0653  | nd          | nd    | nd           | 1.170         | 0.899 | nd           |
| Methyl nicotinate                             | C7 H7 N O2    | -3.12     | 137.04725 | 6.241  | M+H             | 138.0545 | nd          | nd    | nd           | 0.101         | 0.105 | 0.115        |
| 5-Acetyl-2,4-dimethyloxazole                  | C7 H9 N O2    | -2.65     | 139.06296 | 1.103  | M+H             | 140.0701 | 0.019       | 0.018 | 0.021        | 0.123         | 0.157 | nd           |
| 5-Acetyl-2,4-dimethylthiazole                 | C7 H9 N O S   | -2.47     | 155.0401  | 3.873  | M+H             | 156.1381 | nd          | nd    | nd           | 0.008         | nd    | 0.007        |
| 5-Methyl-2-propyloxazole                      | C7 H11 N O    | -0.87     | 125.08396 | 8.612  | M+H             | 126.0913 | nd          | nd    | nd           | 0.020         | 0.016 | 0.009        |
| 4-Ethyl-2-methyloxazole                       | C6 H9 N O     | -0.2      | 111.06839 | 3.437  | M+H             | 112.0757 | nd          | nd    | nd           | nd            | 0.012 | nd           |
| gamma-Butyrolactone                           | C4 H6 O2      | 3.33      | 86.03707  | 1.108  | M+H             | 87.0442  | 0.106       | 0.121 | 0.074        | 0.716         | 0.522 | 0.534        |
| 2-C-Methyl-1,4-erythrono-D-lactone            | C5 H8 O4      | -1.66     | 132.04204 | 1.287  | M+H             | 133.0343 | nd          | nd    | nd           | nd            | nd    | 0.008        |
| 6-Methylquinoline                             | C10 H9 N      | -2.59     | 143.07313 | 5.525  | M+H             | 144.1015 | 0.097       | 0.200 | 0.040        | nd            | nd    | nd           |
| 6-Methoxyquinoline                            | C10 H9 N O    | -2.79     | 159.06797 | 2.63   | M+H             | 160.0752 | 0.090       | 0.099 | 0.050        | nd            | nd    | nd           |
| N-hydroxy-L-tryptophan                        | C11 H12 N2 O3 | -1.88     | 220.08438 | 2.308  | M-H             | 218.9817 | 0.022       | 0.026 | 0.027        | nd            | nd    | nd           |
| Indole-3-glycol                               | C10 H11 N O2  | -2.6      | 177.07852 | 11.073 | M+H             | 178.0860 | nd          | nd    | nd           | 0.011         | 0.010 | 0.011        |
| N-acetyl serotonin                            | C12 H14 N2 O2 | -2.32     | 218.10502 | 9.722  | M+H             | 219.1122 | nd          | nd    | nd           | 0.008         | 0.013 | 0.008        |
| Tryptophol                                    | C10 H11 N O   | -2        | 161.08374 | 12.105 | M+H             | 162.0910 | nd          | nd    | nd           | 0.003         | 0.003 | nd           |
| Methyl dioxindole-3-acetate                   | C11 H11 N O4  | -2.46     | 221.06826 | 7.552  | M+H             | 222.0755 | nd          | nd    | nd           | 0.026         | 0.019 | 0.031        |
| Indole-3-acetic acid                          | C10 H9 N O2   | -3.26     | 175.06276 | 3.816  | M+H             | 176.0701 | nd          | nd    | nd           | 0.107         | 0.075 | 0.122        |
| Indole-3-acetate                              | C10 H9 N O2   | -3.27     | 175.06276 | 6.078  | M+H             | 176.0702 | nd          | nd    | nd           | 0.046         | 0.039 | 0.057        |
| Mascaroside                                   | C26 H36 O10   | -4.34     | 508.22864 | 10.151 | M+H             | 509.2356 | 0.456       | 0.347 | 0.330        | nd            | 0.110 | 0.080        |
| Cafestol                                      | C20 H28 O3    | -2.66     | 316.203   | 16.401 | M+H             | 317.2103 | nd          | nd    | nd           | 0.007         | 0.007 | 0.006        |
| Tetramethylpyrazine                           | C8 H12 N2     | -2.32     | 136.09973 | 10.515 | M+H             | 137.1070 | nd          | nd    | nd           | 0.043         | 0.045 | 0.042        |
| 2-Isopropyl-5-methoxypyrazine                 | C8 H12 N2 O   | -2.85     | 152.09453 | 6.501  | M+H             | 153.1018 | nd          | nd    | nd           | 0.082         | 0.113 | 0.075        |
| 2-Isopropyl-3,5-dimethoxy-6-methylpyrazine    | C10 H16 N2 O2 | -2.46     | 196.1207  | 6.676  | M+H             | 197.1279 | nd          | nd    | nd           | 0.045         | 0.050 | 0.049        |
| 6,7-Dihydro-2-methyl-5H-cyclopenta[b]pyrazine | C8 H10 N2     | -1.52     | 134.08419 | 9.046  | M+H             | 135.0915 | nd          | nd    | nd           | 0.012         | 0.014 | 0.014        |

| Compounds                                  | Formula        | Error ppm | MW        | RT     | MS <sup>2</sup> | M/Z      | Postharvest |       |              |               |       |              |
|--------------------------------------------|----------------|-----------|-----------|--------|-----------------|----------|-------------|-------|--------------|---------------|-------|--------------|
|                                            |                |           |           |        |                 |          | Green beans |       |              | Roasted beans |       |              |
|                                            |                |           |           |        |                 |          | Natural     | Honey | Fully washed | Natural       | Honey | Fully washed |
| 1-Propenylpyrazine                         | C7 H8 N2       | -0.46     | 120.06869 | 7.325  | M+H             | 121.0760 | nd          | nd    | nd           | 0.009         | 0.011 | 0.009        |
| 3-Ethyl-2-methoxypyrazine                  | C7 H10 N2 O    | -2.37     | 138.07899 | 4.969  | M+H             | 139.0861 | nd          | nd    | nd           | 0.119         | 0.128 | 0.110        |
| 2-Methoxy-3-(2-methylpropyl)pyrazine       | C9 H14 N2 O    | -2.02     | 166.11028 | 8.469  | M+H             | 167.1176 | nd          | nd    | nd           | 0.015         | 0.013 | 0.014        |
| 2,6-Dimethyl-pyrazine                      | C6 H8 N2       | -0.53     | 108.06869 | 6.715  | M+H             | 109.0760 | nd          | nd    | nd           | 0.344         | 0.364 | 0.346        |
| 5-Methyl-2-ethyl-pyrazine                  | C7 H10 N2      | -1.46     | 122.08422 | 9.071  | M+H             | 123.0915 | nd          | nd    | nd           | 0.104         | 0.102 | 0.099        |
| 6-Methyl-2-ethyl-pyrazine                  | C7 H10 N2      | -1.46     | 122.08422 | 8.03   | M+H             | 123.0915 | nd          | nd    | nd           | 0.069         | 0.076 | 0.061        |
| Methylpyrazine                             | C5 H6 N2       | 1.31      | 94.05322  | 4.782  | M+H             | 95.0605  | nd          | nd    | nd           | 0.395         | 0.447 | 0.398        |
| xi-Salsolinol                              | C10 H13 N O2   | -1.73     | 179.09432 | 1.642  | M+H             | 180.1016 | nd          | nd    | nd           | 0.025         | 0.012 | 0.028        |
| Propyl 2-furoate                           | C8 H10 O3      | -2.8      | 154.06256 | 10.738 | M+H             | 155.0699 | nd          | nd    | nd           | 0.015         | 0.017 | 0.015        |
| Ethyl 2-phenyl-3-furancarboxylate          | C13 H12 O3     | -1.51     | 216.07832 | 9.053  | M+H             | 217.0856 | nd          | nd    | nd           | 0.003         | nd    | 0.003        |
| Furfuryl acetate                           | C7 H8 O3       | -2.92     | 140.04694 | 8.26   | M+H             | 141.0542 | nd          | nd    | nd           | 0.076         | 0.082 | 0.111        |
| 2,5-Furandicarboxylic acid                 | C6 H4 O5       | -1.58     | 156.00563 | 1.499  | M+H             | 157.0128 | nd          | nd    | nd           | 0.012         | 0.012 | 0.011        |
| 3-(2-Furanylmethylene)pyrrolidine          | C9 H11 N O     | -2.39     | 149.08371 | 1.16   | M+H             | 150.1122 | nd          | nd    | nd           | nd            | 0.050 | nd           |
| Ethyl maltol                               | C7 H8 O3       | -2.93     | 140.04693 | 5.086  | M+H             | 141.0543 | nd          | nd    | nd           | 0.073         | 0.055 | 0.062        |
| Kojic acid                                 | C6 H6 O4       | -2.29     | 142.02628 | 4.818  | M+H             | 143.0335 | nd          | nd    | nd           | 0.082         | 0.111 | 0.085        |
| 4-Hydroxy-2-butenoic acid gamma-lactone    | C4 H4 O2       | 2.85      | 84.02137  | 1.716  | M+H             | 85.0285  | nd          | nd    | nd           | 0.191         | 0.204 | 0.205        |
| Norfuraneol                                | C5 H6 O3       | -0.92     | 114.03159 | 2.722  | M+H             | 115.0389 | nd          | nd    | nd           | 0.207         | 0.196 | 0.193        |
| 3-Hydroxy-4,5-dimethyl-2(5H)-furanone      | C6 H8 O3       | -2.2      | 128.04706 | 5.087  | M+H             | 129.0543 | nd          | nd    | nd           | 0.586         | 0.650 | 0.595        |
| Pratenol A                                 | C14 H12 O5     | -1.8      | 260.06801 | 9.719  | M-H             | 259.0608 | nd          | nd    | nd           | 0.005         | 0.010 | 0.012        |
| Eugenitin                                  | C12 H12 O4     | -2.4      | 220.07303 | 9.424  | M+H             | 221.0804 | nd          | nd    | nd           | 0.009         | 0.010 | 0.010        |
| Coriandrone E                              | C13 H12 O5     | -2.19     | 248.06793 | 9.616  | M-H             | 247.0607 | nd          | nd    | nd           | 0.003         | nd    | nd           |
| Dillapional                                | C12 H12 O5     | -2.45     | 236.06789 | 5.857  | M+H             | 235.0606 | nd          | nd    | nd           | 0.116         | 0.103 | 0.109        |
| 4-Amino-2-methyl-5-phosphomethylpyrimidine | C6 H10 N3 O4 P | 3.13      | 219.04158 | 7.972  | M+H             | 220.0488 | nd          | nd    | nd           | 0.014         | 0.015 | 0.015        |
| Clarycet                                   | C11 H20 O3     | -2.17     | 200.14081 | 14.865 | M+H             | 201.1481 | nd          | nd    | 0.004        | 0.006         | 0.002 | nd           |
| Methylisopelletierine                      | C9 H17 N O     | -1.72     | 155.13075 | 12.303 | M+H             | 156.1380 | nd          | nd    | nd           | 0.005         | 0.003 | 0.016        |
| Isosalsolidine                             | C12 H13 N O2   | -3.55     | 203.09391 | 2.46   | M+H             | 204.1011 | nd          | nd    | nd           | 0.178         | 0.138 | 0.190        |

| Compounds                                         | Formula      | Error ppm | MW        | RT     | MS <sup>2</sup> | M/Z      | Postharvest   |               |               |               |               |               |
|---------------------------------------------------|--------------|-----------|-----------|--------|-----------------|----------|---------------|---------------|---------------|---------------|---------------|---------------|
|                                                   |              |           |           |        |                 |          | Green beans   |               |               | Roasted beans |               |               |
|                                                   |              |           |           |        |                 |          | Natural       | Honey         | Fully washed  | Natural       | Honey         | Fully washed  |
| 2,3-Dihydro-5-(5-methyl-2-furanyl)-1H-pyrrolizine | C12 H13 N O  | -1.71     | 187.09939 | 5.88   | M+H             | 188.1066 | nd            | nd            | nd            | 0.023         | 0.014         | 0.038         |
| 3-Oxo-carbofuran                                  | C12 H13 N O4 | -2.14     | 235.08396 | 9.299  | M+H             | 236.0913 | nd            | nd            | nd            | 0.012         | 0.007         | 0.010         |
| <b>Total</b>                                      |              |           |           |        |                 |          | <b>1.486</b>  | <b>1.539</b>  | <b>1.162</b>  | <b>6.438</b>  | <b>6.101</b>  | <b>5.123</b>  |
| <b>Alkaloid</b>                                   |              |           |           |        |                 |          |               |               |               |               |               |               |
| Trigonelline                                      | C7 H7 N O2   | -2.91     | 137.04728 | 1.119  | M+H             | 138.0544 | 10.858        | 10.740        | 12.014        | 9.687         | 10.243        | 10.347        |
| Theobromine                                       | C7 H8 N4 O2  | -1.75     | 180.06441 | 4.72   | M+H             | 181.0717 | 0.022         | 0.025         | 0.022         | 0.019         | 0.029         | 0.022         |
| Theophylline                                      | C7 H8 N4 O2  | -1.85     | 180.06439 | 4.529  | M+H             | 181.0717 | 0.012         | 0.007         | 0.010         | nd            | 0.007         | 0.009         |
| Caffeine                                          | C8 H10 N4 O2 | -3.78     | 194.07964 | 7.106  | M+H             | 195.0867 | 15.839        | 16.784        | 17.148        | 14.362        | 14.768        | 16.617        |
| 3beta,6beta-Dihydroxynortropane                   | C7 H13 N O2  | -2.04     | 143.09434 | 1.206  | M+H             | 144.0806 | 0.189         | 0.146         | 0.191         | nd            | nd            | nd            |
| Arecoline                                         | C8 H13 N O2  | -2.37     | 155.09426 | 5.553  | M+H             | 156.1016 | nd            | nd            | nd            | 0.062         | 0.043         | 0.029         |
| Hygrine                                           | C8 H15 N O   | -2.36     | 141.11503 | 1.404  | M+H             | 142.1224 | nd            | nd            | nd            | 0.011         | 0.013         | 0.010         |
| Homoarecoline                                     | C9 H15 N O2  | -2.23     | 169.1099  | 6.892  | M+H             | 170.0807 | nd            | nd            | nd            | nd            | nd            | 0.007         |
| <b>Total</b>                                      |              |           |           |        |                 |          | <b>26.920</b> | <b>27.702</b> | <b>29.385</b> | <b>24.142</b> | <b>25.104</b> | <b>27.041</b> |
| <b>Organic acids and derivatives</b>              |              |           |           |        |                 |          |               |               |               |               |               |               |
| Triethyl citrate                                  | C12 H20 O7   | -1.95     | 276.12037 | 12.151 | M-H             | 275.1132 | 0.034         | 0.025         | 0.030         | 0.031         | 0.022         | 0.025         |
| N6-Acetyl-L-lysine                                | C8 H16 N2 O3 | -1.36     | 188.11584 | 1.19   | M+H             | 188.0700 | 0.022         | nd            | nd            | nd            | nd            | nd            |
| <b>Total</b>                                      |              |           |           |        |                 |          | <b>0.056</b>  | <b>0.025</b>  | <b>0.030</b>  | <b>0.031</b>  | <b>0.022</b>  | <b>0.025</b>  |
| <b>Lipids and lipid-like molecules</b>            |              |           |           |        |                 |          |               |               |               |               |               |               |
| Stearic acid                                      | C18 H36 O2   | -0.74     | 284.27132 | 22.979 | M-H             | 283.2638 | 0.032         | 0.027         | 0.039         | 0.031         | 0.040         | 0.033         |
| Palmitelaidic acid                                | C16 H30 O2   | -2.19     | 254.22402 | 20.366 | M+H             | 253.1277 | 0.010         | nd            | nd            | nd            | nd            | nd            |
| alpha-Linolenic acid                              | C18 H30 O2   | -1.05     | 278.22429 | 21.112 | M-H             | 277.2169 | 0.004         | nd            | 0.003         | nd            | nd            | nd            |
| Oleic acid                                        | C18 H34 O2   | -1.32     | 282.25551 | 19.323 | M-H             | 281.1391 | 0.007         | nd            | nd            | nd            | nd            | nd            |
| Linolenelaidic acid                               | C18 H30 O2   | -1.96     | 278.22403 | 18.921 | M-H             | 277.2169 | 0.011         | 0.006         | 0.009         | nd            | nd            | nd            |
| Linoleic acid                                     | C18 H32 O2   | -1.17     | 280.2399  | 22.126 | M-H             | 279.2324 | 0.058         | 0.027         | 0.064         | 0.011         | 0.006         | 0.013         |
| Stearidonic acid                                  | C18 H28 O2   | -1.4      | 276.20854 | 18.391 | M+H             | 277.2131 | 0.004         | nd            | 0.003         | nd            | nd            | nd            |
| 1-Linoleoyl glycerol                              | C21 H38 O4   | -1.85     | 354.27635 | 20.994 | M+H             | 355.1012 | 0.004         | 0.002         | nd            | nd            | nd            | nd            |
| Traumatic Acid                                    | C12 H20 O4   | -1.02     | 228.13593 | 10.943 | M+H             | 229.1404 | nd            | nd            | 0.003         | nd            | nd            | nd            |
| 8-Hydroxyhexadecanedioic acid                     | C16 H30 O5   | -2.48     | 302.20857 | 17.04  | M+H             | 303.2157 | nd            | nd            | 0.005         | 0.012         | 0.004         | 0.002         |

| Compounds                                    | Formula       | Error ppm | MW        | RT     | MS <sup>2</sup> | M/Z      | Postharvest  |              |              |               |              |              |
|----------------------------------------------|---------------|-----------|-----------|--------|-----------------|----------|--------------|--------------|--------------|---------------|--------------|--------------|
|                                              |               |           |           |        |                 |          | Green beans  |              |              | Roasted beans |              |              |
|                                              |               |           |           |        |                 |          | Natural      | Honey        | Fully washed | Natural       | Honey        | Fully washed |
| (-)-pinellic acid                            | C18 H34 O5    | -3.97     | 330.23931 | 18.678 | M+H             | 313.1768 | nd           | nd           | 0.024        | 0.056         | 0.020        | 0.009        |
| Sorbic acid                                  | C6 H8 O2      | -0.68     | 112.05235 | 5.991  | M+H             | 113.0596 | nd           | nd           | nd           | 0.202         | 0.149        | 0.209        |
| Prostaglandin B1                             | C20 H32 O4    | -1.74     | 336.22948 | 16.082 | M-H             | 335.2222 | nd           | nd           | nd           | 0.004         | nd           | 0.004        |
| Diethyl maleate                              | C8 H12 O4     | -1.19     | 172.07335 | 5.283  | M+H             | 173.0807 | nd           | nd           | nd           | 0.020         | nd           | 0.018        |
| Prostaglandin B-2                            | C20 H30 O4    | -1.55     | 334.21389 | 14.368 | M-H             | 333.2066 | nd           | nd           | nd           | 0.030         | 0.025        | 0.028        |
| g-Butyrobetaine                              | C7 H15 N O2   | -2.09     | 145.10998 | 1.129  | M+H             | 146.1172 | nd           | nd           | nd           | 0.050         | 0.035        | 0.042        |
| Tetradecanoylcarnitine                       | C21 H41 N O4  | -2.67     | 371.30257 | 21     | M+H             | 372.1280 | nd           | nd           | nd           | 0.012         | nd           | nd           |
| 11-Oxooctadecanoic acid                      | C18 H34 O3    | -2.21     | 298.25014 | 19.193 | M-H             | 297.2429 | nd           | nd           | nd           | nd            | 0.006        | nd           |
| Stearoyllactic acid                          | C21 H40 O4    | -2.6      | 356.29173 | 22.05  | M+H             | 357.2029 | nd           | nd           | nd           | nd            | 0.001        | nd           |
| (Z)-3-(1-Formyl-1-propenyl)pentanedioic acid | C9 H12 O5     | -2.24     | 200.06803 | 4.405  | M+H             | 201.0753 | nd           | nd           | nd           | nd            | 0.038        | 0.031        |
| Butenylcarnitine                             | C11 H19 N O4  | -2.93     | 229.13074 | 13.856 | M+H             | 230.2472 | nd           | nd           | nd           | nd            | nd           | 0.003        |
| Palmitic acid                                | C16 H32 O2    | -1.72     | 256.23979 | 23.263 | M+H             | 274.2726 | nd           | nd           | nd           | nd            | nd           | nd           |
| Gibberellin A24                              | C20 H26 O5    | -4.29     | 346.17654 | 9.687  | M+H             | 347.1847 | 0.175        | 0.147        | 0.149        | nd            | nd           | nd           |
| Gibberellin A12                              | C20 H28 O4    | -1.84     | 332.19815 | 9.364  | M+H             | 333.2052 | 0.009        | nd           | 0.009        | 0.013         | 0.014        | 0.013        |
| Crocetin                                     | C20 H24 O4    | -2.48     | 328.16665 | 9.686  | M+H             | 329.1740 | 0.032        | 0.026        | 0.026        | nd            | nd           | nd           |
| Atractyligenin                               | C19 H28 O4    | -1.57     | 320.19826 | 11.754 | M-H             | 319.1910 | nd           | nd           | nd           | 0.008         | 0.005        | 0.007        |
| alpha-Crocetin glucosyl ester                | C26 H34 O9    | -2.74     | 490.21894 | 13.168 | M+H             | 491.2262 | nd           | nd           | nd           | 0.039         | 0.039        | 0.030        |
| Kahweol                                      | C20 H26 O3    | -2.57     | 314.18739 | 13.253 | M+H             | 315.1947 | nd           | nd           | nd           | 0.011         | 0.012        | 0.012        |
| (+/-)-Camphor                                | C10 H16 O     | -1.69     | 152.11986 | 8.149  | M+H             | 153.0546 | 0.013        | 0.010        | 0.008        | nd            | nd           | nd           |
| Citroside                                    | C19 H30 O8    | -1.21     | 386.1936  | 8.018  | M-H             | 385.1133 | 0.011        | 0.010        | 0.008        | nd            | nd           | nd           |
| L-alpha-Glycerylphosphorylcholine            | C8 H20 N O6 P | -2.02     | 257.1023  | 1.173  | M+H             | 258.1095 | 0.032        | 0.039        | 0.037        | 0.015         | 0.025        | 0.019        |
| 1-Stearoylglycerol                           | C21 H42 O4    | -1.92     | 358.30762 | 20.038 | M+H             | 359.3150 | 0.011        | nd           | nd           | nd            | nd           | nd           |
| <b>Total</b>                                 |               |           |           |        |                 |          | <b>0.414</b> | <b>0.293</b> | <b>0.386</b> | <b>0.512</b>  | <b>0.418</b> | <b>0.472</b> |
| <b>Phenylpropanoids and polyketides</b>      |               |           |           |        |                 |          |              |              |              |               |              |              |
| Naringenin                                   | C15 H12 O5    | -2.71     | 272.06774 | 8.631  | M-H             | 271.2273 | nd           | nd           | nd           | nd            | nd           | 0.004        |
| Prunin                                       | C21 H22 O10   | -1.82     | 434.12051 | 9.771  | M+H             | 435.1279 | nd           | nd           | nd           | nd            | nd           | nd           |
| Rhaponticin                                  | C21 H24 O9    | -2.48     | 420.14099 | 11.326 | M+H             | 421.1485 | 0.109        | 0.074        | 0.084        | nd            | nd           | nd           |
| <b>Total</b>                                 |               |           |           |        |                 |          | <b>0.109</b> | <b>0.074</b> | <b>0.084</b> | <b>nd</b>     | <b>nd</b>    | <b>0.004</b> |



| Compounds                                        | Formula        | Error ppm | MW        | RT     | MS <sup>2</sup> | M/Z      | Postharvest  |              |              |               |              |              |
|--------------------------------------------------|----------------|-----------|-----------|--------|-----------------|----------|--------------|--------------|--------------|---------------|--------------|--------------|
|                                                  |                |           |           |        |                 |          | Green beans  |              |              | Roasted beans |              |              |
|                                                  |                |           |           |        |                 |          | Natural      | Honey        | Fully washed | Natural       | Honey        | Fully washed |
| <b>Carbohydrates and carbohydrate conjugates</b> |                |           |           |        |                 |          |              |              |              |               |              |              |
| Picrocrocin                                      | C16 H26 O7     | -1.71     | 330.16729 | 15.569 | M+H             | 331.1742 | 0.018        | 0.004        | 0.015        | 0.005         | nd           | nd           |
| Glucosaminic Acid                                | C7 H14 O8      | -2.81     | 226.06823 | 1.047  | M-H             | 225.0609 | 0.013        | nd           | 0.008        | 0.014         | 0.019        | nd           |
| D-(-)-Mannitol                                   | C6 H14 O6      | -4.85     | 182.07815 | 1.055  | M+H             | 183.1014 | 0.011        | 0.006        | 0.008        | nd            | nd           | nd           |
| D-(-)-3-Phosphoglyceric acid                     | C3 H7 O7 P     | -0.9      | 185.99277 | 1.816  | M+H             | 187.0078 | 0.006        | 0.087        | 0.103        | nd            | nd           | nd           |
| 5-Aminoimidazole ribonucleotide                  | C8 H14 N3 O7 P | 4.11      | 295.05815 | 1.033  | M+H             | 296.0655 | 0.035        | nd           | 0.035        | nd            | nd           | nd           |
| 4-Hydroxybenzoic acid glucoside                  | C13 H16 O8     | -1.08     | 300.08419 | 7.079  | M-H             | 299.2225 | 0.012        | 0.008        | 0.010        | nd            | nd           | nd           |
| D-Glucuronic acid                                | C6 H10 O7      | -4.59     | 194.04176 | 1.058  | M+H             | 195.0871 | nd           | 0.005        | nd           | nd            | nd           | nd           |
| D-(-)-Fructose                                   | C6 H12 O6      | -4.62     | 180.06256 | 1.067  | M+H             | 181.9869 | nd           | 0.008        | nd           | nd            | nd           | nd           |
| ribulose 5-phosphate                             | C5 H11 O8 P    | -1.92     | 230.01871 | 1.13   | M+H             | 231.0259 | nd           | nd           | nd           | 0.266         | 0.229        | 0.289        |
| Erythrose, 4-phosphate                           | C4 H9 O7 P     | -1.71     | 200.00825 | 1.152  | M+H             | 201.0156 | nd           | nd           | nd           | 0.186         | nd           | 0.205        |
| Gluconic acid                                    | C6 H12 O7      | -5.74     | 196.05718 | 1.077  | M+H             | 196.0905 | nd           | nd           | nd           | nd            | 0.012        | nd           |
| Total                                            |                |           |           |        |                 |          | <b>0.095</b> | <b>0.118</b> | <b>0.178</b> | <b>0.470</b>  | <b>0.260</b> | <b>0.494</b> |
| <b>Phenolic acids</b>                            |                |           |           |        |                 |          |              |              |              |               |              |              |
| Methyl caffeate                                  | C10 H10 O4     | -1.92     | 194.05754 | 6.824  | M+H             | 195.0870 | 0.097        | nd           | nd           | nd            | nd           | nd           |
| Total                                            |                |           |           |        |                 |          | <b>0.097</b> | <b>nd</b>    | <b>nd</b>    | <b>nd</b>     | <b>nd</b>    | <b>nd</b>    |
| <b>Benzenoid</b>                                 |                |           |           |        |                 |          |              |              |              |               |              |              |
| 2-Phenylpropyl isobutyrate                       | C13 H18 O2     | -1.43     | 206.13038 | 7.993  | M+H             | 207.1375 | 0.021        | 0.021        | 0.017        | 0.014         | 0.015        | 0.013        |
| Tyramine                                         | C8 H11 N O     | -0.96     | 137.08393 | 1.867  | M+H             | 138.0911 | nd           | 0.009        | nd           | 0.023         | 0.017        | 0.023        |
| Salicylic acid                                   | C7 H6 O3       | -1.76     | 138.03145 | 5.337  | M+H             | 139.0387 | nd           | nd           | nd           | 0.013         | 0.015        | 0.013        |
| Propylparaben                                    | C10 H12 O3     | -1.39     | 180.07839 | 10.065 | M+H             | 181.0856 | nd           | nd           | nd           | 0.008         | nd           | 0.008        |
| Zein                                             | C7 H7 F O2 S   | 1.42      | 174.01533 | 1.155  | M-H             | 173.0080 | nd           | nd           | nd           | 0.022         | 0.020        | 0.019        |
| 1-nitro-2-phenylethane                           | C8 H9 N O2     | -3.19     | 151.06285 | 1.571  | M+H             | 152.0702 | nd           | nd           | nd           | 0.121         | 0.111        | 0.118        |
| Eudesmic acid                                    | C10 H12 O5     | -3.37     | 212.06776 | 9.649  | M-H             | 211.0605 | nd           | nd           | nd           | 0.013         | 0.010        | 0.013        |
| 3-Aminosalicylic acid                            | C7 H7 N O3     | -3.97     | 153.04199 | 6.948  | M+H             | 154.0493 | nd           | nd           | nd           | 0.137         | 0.159        | 0.129        |
| N-Methyltyramine                                 | C9 H13 N O     | -2.13     | 151.09939 | 4.093  | M+H             | 152.1066 | nd           | nd           | nd           | 0.040         | 0.027        | 0.035        |
| Salicylaldehyde                                  | C7 H6 O3       | -2.33     | 138.03145 | 5.337  | M+H             | 139.0387 | nd           | nd           | nd           | 0.013         | 0.015        | 0.013        |
| (R)-Bitalin A                                    | C13 H14 O3     | -2.4      | 218.09377 | 11.016 | M+H             | 219.1011 | nd           | nd           | nd           | 0.013         | 0.006        | 0.014        |
| Allyl phenoxyacetate                             | C11 H12 O3     | -3.11     | 192.07805 | 10.254 | M+H             | 193.0858 | nd           | nd           | nd           | 0.011         | 0.008        | 0.012        |

| Compounds                                      | Formula      | Error ppm | MW        | RT     | MS <sup>2</sup> | M/Z      | Postharvest  |              |              |               |              |              |
|------------------------------------------------|--------------|-----------|-----------|--------|-----------------|----------|--------------|--------------|--------------|---------------|--------------|--------------|
|                                                |              |           |           |        |                 |          | Green beans  |              |              | Roasted beans |              |              |
|                                                |              |           |           |        |                 |          | Natural      | Honey        | Fully washed | Natural       | Honey        | Fully washed |
| Allyl anthranilate                             | C10 H11 N O2 | -2.58     | 177.07852 | 6.891  | M+H             | 178.0858 | nd           | nd           | nd           | 0.037         | 0.044        | 0.029        |
| 2-(3-Phenylpropyl)tetrahydrofuran              | C13 H18 O    | -2.17     | 190.13535 | 16.179 | M+H             | 191.0701 | nd           | nd           | nd           | 0.005         | nd           | 0.004        |
| Methyl anthranilate                            | C8 H9 N O2   | -3.79     | 151.06276 | 8.897  | M+H             | 152.0701 | nd           | nd           | nd           | 0.082         | 0.066        | nd           |
| Methyl N-methylantranilate                     | C9 H11 N O2  | -3.03     | 165.07848 | 1.94   | M+H             | 166.0860 | nd           | nd           | nd           | 0.054         | nd           | 0.039        |
| Ethyl anthranilate                             | C9 H11 N O2  | -3.06     | 165.07847 | 10.231 | M-H             | 181.0497 | nd           | nd           | nd           | 0.024         | 0.018        | nd           |
| methyl 4-hydroxy-3-methoxybenzoate             | C9 H10 O4    | -1        | 182.05773 | 9.545  | M+H             | 183.0914 | nd           | nd           | nd           | nd            | 0.004        | 0.004        |
| 2-Methyl-1-phenyl-2-propanyl butyrate          | C14 H20 O2   | -1.72     | 220.14595 | 8.943  | M+H             | 211.1435 | nd           | nd           | nd           | nd            | nd           | 0.004        |
| 4-Methoxysalicylic acid                        | C8 H8 O4     | -3.71     | 168.04163 | 7.316  | M+H             | 169.0856 | nd           | nd           | nd           | nd            | nd           | 0.048        |
| 2-Methoxy-4-(4-methyl-1,3-dioxolan-2-yl)phenol | C11 H14 O4   | -3.72     | 210.08843 | 7.102  | M-H             | 209.0812 | nd           | nd           | nd           | 0.056         | 0.051        | 0.056        |
| Phloroglucinol                                 | C6 H6 O3     | -2.51     | 126.03138 | 4.836  | M+H             | 127.0388 | nd           | nd           | nd           | 0.697         | 0.358        | 0.863        |
| 1-(3-Hydroxy-4-methoxyphenyl)-1,2-ethanediol   | C9 H12 O4    | -1.87     | 184.07321 | 6.368  | M+H             | 185.0918 | nd           | nd           | nd           | 0.034         | 0.034        | 0.041        |
| 1,2-Benzenediol                                | C6 H6 O2     | -0.94     | 110.03668 | 6.83   | M+H             | 111.0440 | nd           | nd           | nd           | 0.320         | 0.265        | 0.344        |
| 1,3-Benzenediol                                | C6 H6 O2     | -0.91     | 110.03668 | 3.321  | M+H             | 111.0441 | nd           | nd           | nd           | 0.046         | 0.064        | 0.068        |
| 2,6-Dimethoxy-4-(1-propenyl)phenol             | C11 H14 O3   | -4.62     | 194.0934  | 10.267 | M-H             | 193.0861 | nd           | nd           | nd           | 0.005         | 0.004        | 0.005        |
| (R)-Synephrine                                 | C9 H13 N O3  | -1.74     | 183.08923 | 4.74   | M+H             | 184.0965 | nd           | nd           | nd           | 0.020         | 0.019        | 0.016        |
| Vanillyl alcohol                               | C8 H10 O3    | -3.1      | 154.06252 | 4.841  | M+H             | 155.0699 | nd           | nd           | nd           | nd            | 0.039        | 0.050        |
| Toluidine                                      | C7 H9 N      | 0.54      | 107.07356 | 1.118  | M+H             | 108.0808 | nd           | nd           | nd           | 0.049         | 0.032        | 0.050        |
| 4-Amino-2-methyl-1-naphthol                    | C11 H11 N O  | -1.99     | 173.08372 | 3.909  | M+H             | 174.0910 | nd           | nd           | nd           | 0.066         | 0.055        | 0.102        |
| 4-Methoxy-1-naphthol                           | C11 H10 O2   | -1.72     | 174.06778 | 12.194 | M+H             | 175.0750 | nd           | nd           | nd           | 0.004         | 0.004        | 0.004        |
| Juglone                                        | C10 H6 O3    | -1.57     | 174.03142 | 8.754  | M+H             | 175.0387 | nd           | nd           | nd           | 0.010         | 0.007        | nd           |
| 1,4-dihydroxy-2-naphthoate                     | C11 H8 O4    | -2.12     | 204.04183 | 9.252  | M+H             | 205.0856 | nd           | nd           | nd           | 0.010         | 0.011        | 0.011        |
| Vanillin isobutyrate                           | C12 H14 O4   | -1.99     | 222.08877 | 13.111 | M+H             | 223.0961 | nd           | nd           | nd           | 0.009         | 0.006        | 0.008        |
| Guaicyl acetate                                | C9 H10 O3    | -4.63     | 166.06222 | 9.384  | M+H             | 167.0700 | nd           | nd           | nd           | 0.029         | nd           | nd           |
| 1'-Acetoxyeugenol acetate                      | C14 H16 O5   | -2.23     | 264.09918 | 9.725  | M+H             | 265.1065 | nd           | nd           | nd           | 0.009         | 0.007        | 0.013        |
| Isoeugenol formate                             | C11 H12 O3   | -1.67     | 192.07832 | 7.931  | M+H             | 193.0858 | nd           | nd           | nd           | 0.005         | 0.004        | 0.005        |
| <b>Total</b>                                   |              |           |           |        |                 |          | <b>0.021</b> | <b>0.031</b> | <b>0.017</b> | <b>2.003</b>  | <b>1.505</b> | <b>2.178</b> |

| Compounds                               | Formula         | Error ppm | MW        | RT     | MS <sup>2</sup> | M/Z      | Postharvest  |              |              |               |              |              |
|-----------------------------------------|-----------------|-----------|-----------|--------|-----------------|----------|--------------|--------------|--------------|---------------|--------------|--------------|
|                                         |                 |           |           |        |                 |          | Green beans  |              |              | Roasted beans |              |              |
|                                         |                 |           |           |        |                 |          | Natural      | Honey        | Fully washed | Natural       | Honey        | Fully washed |
| <b>Carboxylic acids and derivatives</b> |                 |           |           |        |                 |          |              |              |              |               |              |              |
| Propyl propane thiosulfonate            | C11 H16 O5      | -1.75     | 228.09938 | 11.882 | M+H             | 229.1065 | 0.007        | 0.007        | 0.009        | 0.006         | 0.007        | 0.007        |
| Citric acid                             | C6 H8 O7        | -4.97     | 192.02605 | 1.172  | M-H             | 191.0186 | 1.762        | 1.614        | 1.592        | 0.534         | nd           | nd           |
| Capsi-amide                             | C17 H35 N O     | -1.8      | 269.27138 | 21.613 | M-H             | 268.1466 | 0.002        | nd           | nd           | nd            | nd           | nd           |
| €-Aconitic acid                         | C6 H6 O6        | -1.73     | 174.01614 | 1.494  | M+H             | 175.0234 | 0.029        | 0.033        | 0.033        | 0.026         | 0.027        | 0.030        |
| 2-succinylbenzoate                      | C11 H10 O5      | -3.76     | 222.05199 | 9.255  | M+H             | 223.0593 | nd           | nd           | nd           | 0.052         | 0.053        | nd           |
| Ginsenoynes H                           | C19 H26 O3      | -4.48     | 302.18684 | 10.17  | M+H             | 303.1947 | nd           | nd           | nd           | 0.096         | 0.092        | 0.085        |
| Ethyl pyruvate                          | C5 H8 O3        | -1.05     | 116.04722 | 1.598  | M+H             | 117.0545 | nd           | nd           | nd           | nd            | nd           | 0.108        |
| Total                                   |                 |           |           |        |                 |          | <b>1.799</b> | <b>1.654</b> | <b>1.634</b> | <b>0.714</b>  | <b>0.179</b> | <b>0.229</b> |
| <b>Organonitrogen compounds</b>         |                 |           |           |        |                 |          |              |              |              |               |              |              |
| Choline                                 | C5 H13 N O      | 0.88      | 103.0998  | 1.089  | M+H             | 104.1069 | 1.836        | 1.837        | 2.181        | 1.979         | 1.776        | 1.632        |
| Putrescine                              | C4 H12 N2       | 3.23      | 88.1004   | 1.074  |                 |          | 0.042        | 0.039        | nd           | nd            | nd           | nd           |
| Total                                   |                 |           |           |        |                 |          | <b>1.877</b> | <b>1.877</b> | <b>2.181</b> | <b>1.979</b>  | <b>1.776</b> | <b>1.632</b> |
| <b>Purine nucleotides</b>               |                 |           |           |        |                 |          |              |              |              |               |              |              |
| Adenosine 5'-monophosphate              | C10 H14 N5 O7 P | -1.64     | 347.06252 | 1.33   | M+H             | 348.2165 | 0.006        | 0.007        | 0.005        | nd            | nd           | nd           |
| Adenosine                               | C10 H13 N5 O4   | -3.26     | 267.09588 | 2.675  | M+H             | 268.1029 | 0.106        | 0.131        | 0.140        | 0.133         | 0.136        | 0.126        |
| Total                                   |                 |           |           |        |                 |          | <b>0.112</b> | <b>0.138</b> | <b>0.145</b> | <b>0.133</b>  | <b>0.136</b> | <b>0.126</b> |
| <b>Purines and purine derivatives</b>   |                 |           |           |        |                 |          |              |              |              |               |              |              |
| Adenine                                 | C5 H5 N5        | -2.86     | 135.05411 | 1.355  | M+H             | 136.0614 | 0.028        | 0.042        | 0.021        | 0.138         | 0.116        | 0.122        |
| Total                                   |                 |           |           |        |                 |          | <b>0.028</b> | <b>0.042</b> | <b>0.021</b> | <b>0.138</b>  | <b>0.116</b> | <b>0.122</b> |
| <b>Pyrimidine nucleosides</b>           |                 |           |           |        |                 |          |              |              |              |               |              |              |
| Cytidine                                | C9 H13 N3 O5    | -1        | 243.08528 | 1.291  | M+H             | 244.2269 | 0.009        | 0.010        | nd           | nd            | nd           | nd           |
| Total                                   |                 |           |           |        |                 |          | <b>0.009</b> | <b>0.010</b> | <b>nd</b>    | <b>nd</b>     | <b>nd</b>    | <b>nd</b>    |
| <b>Keto acids and derivatives</b>       |                 |           |           |        |                 |          |              |              |              |               |              |              |
| alpha-Ketoglutaric acid                 | C5 H6 O5        | -2.28     | 146.02119 | 1.493  | M+H             | 147.0285 | 0.037        | 0.040        | 0.047        | 0.039         | 0.042        | 0.044        |
| Total                                   |                 |           |           |        |                 |          | <b>0.037</b> | <b>0.040</b> | <b>0.047</b> | <b>0.039</b>  | <b>0.042</b> | <b>0.044</b> |
| <b>Carbonyl compounds</b>               |                 |           |           |        |                 |          |              |              |              |               |              |              |
| Furfural                                | C5 H4 O2        | 2.37      | 96.02136  | 11.878 | M+H             | 97.0285  | nd           | nd           | nd           | 0.091         | 0.082        | 0.095        |
| Isomaltol                               | C6 H6 O3        | -2.54     | 126.03137 | 3.476  | M+H             | 127.0386 | nd           | nd           | nd           | 2.056         | 1.919        | 2.294        |

| Compounds                                     | Formula     | Error ppm | MW        | RT     | MS <sup>2</sup> | M/Z      | Postharvest |           |              |               |              |              |
|-----------------------------------------------|-------------|-----------|-----------|--------|-----------------|----------|-------------|-----------|--------------|---------------|--------------|--------------|
|                                               |             |           |           |        |                 |          | Green beans |           |              | Roasted beans |              |              |
|                                               |             |           |           |        |                 |          | Natural     | Honey     | Fully washed | Natural       | Honey        | Fully washed |
| Pyrrol-2-methylketone                         | C6 H7 N O   | -0.51     | 109.05271 | 1.46   | M+H             | 110.0599 | nd          | nd        | nd           | 0.663         | 0.597        | 0.637        |
| 4'-Methoxyacetophenone                        | C9 H10 O2   | -1.92     | 150.06779 | 10.145 | M+H             | 151.0751 | nd          | nd        | nd           | 0.008         | 0.004        | 0.007        |
| 1H-Pyrrole-2-carboxaldehyde                   | C5 H5 N O   | 0.89      | 95.0372   | 1.185  | M+H             | 96.0445  | nd          | nd        | nd           | 1.550         | 1.450        | 1.795        |
| 4-Acetyl-2-methylpyrimidine                   | C7 H8 N2 O  | -2        | 136.06339 | 7.414  | M+H             | 137.0706 | nd          | nd        | nd           | 0.039         | 0.046        | 0.038        |
| 1-(5-Methyl-2-furanyl)-1,2-propanedione       | C8 H8 O3    | -7.42     | 152.04622 | 7.32   | M-H             | 151.0390 | nd          | nd        | nd           | nd            | 0.014        | 0.009        |
| 2'-Hydroxyacetophenone                        | C8 H8 O2    | -1.58     | 136.05221 | 7.877  | M+H             | 137.0595 | nd          | nd        | nd           | nd            | 0.017        | 0.016        |
| 3-Methyl-1,2-cyclohexanedione                 | C7 H10 O2   | -1.4      | 126.0679  | 7.949  | M-H             | 125.0232 | nd          | nd        | nd           | nd            | 0.062        | 0.084        |
| 3,5-Dimethyl-1,2-cyclopentanedione            | C7 H10 O2   | -1.34     | 126.06791 | 7.927  | M+H             | 127.0378 | nd          | nd        | nd           | nd            | nd           | nd           |
| 3,4-Dimethyl-1,2-cyclopentanedione            | C7 H10 O2   | -1.34     | 126.06791 | 7.673  | M+H             | 127.0378 | nd          | nd        | nd           | nd            | nd           | nd           |
| gamma-Oxo-3-pyridinebutanal                   | C9 H9 N O2  | -2.45     | 163.06293 | 5.814  | M+H             | 164.0702 | nd          | nd        | nd           | 0.026         | 0.034        | 0.039        |
| <b>Total</b>                                  |             |           |           |        |                 |          | nd          | nd        | <b>nd</b>    | <b>4.433</b>  | <b>4.227</b> | <b>5.014</b> |
| <b>Pyrimidines and pyrimidine derivatives</b> |             |           |           |        |                 |          |             |           |              |               |              |              |
| Pyrimidine                                    | C4 H4 N2    | 3.56      | 80.03773  | 2.66   | M+H             | 81.0450  | nd          | nd        | nd           | 0.020         | 0.024        | 0.021        |
| Uracil                                        | C4 H4 N2 O2 | 0.14      | 112.02729 | 1.724  | M+H             | 113.0346 | nd          | nd        | nd           | 0.010         | 0.009        | 0.009        |
| Total                                         |             |           |           |        |                 |          | <b>nd</b>   | <b>nd</b> | <b>nd</b>    | <b>0.030</b>  | <b>0.033</b> | <b>0.030</b> |
| <b>Organooxygen compounds</b>                 |             |           |           |        |                 |          |             |           |              |               |              |              |
| 2-Acetyl-3,6-dimethylpyrazine                 | C8 H10 N2 O | -1.84     | 150.07904 | 6.09   | M+H             | 151.0863 | nd          | nd        | nd           | 0.009         | 0.008        | 0.008        |
| 2-Acetyl-3,5-dimethylpyrazine                 | C8 H10 N2 O | -1.84     | 150.07904 | 6.941  | M+H             | 151.0864 | nd          | nd        | nd           | 0.007         | 0.008        | 0.007        |
| 2-Acetyl-3-ethylpyrazine                      | C8 H10 N2 O | -1.6      | 150.07907 | 9.561  | M+H             | 151.0864 | nd          | nd        | nd           | 0.004         | 0.005        | nd           |
| 2-Acetyloxazole                               | C5 H5 N O2  | -0.29     | 111.032   | 1.572  | M+H             | 112.0393 | nd          | nd        | nd           | 0.026         | 0.023        | 0.028        |
| benzoquinone                                  | C6 H4 O2    | -0.33     | 108.02109 | 3.433  | M+H             | 109.0284 | nd          | nd        | nd           | 0.328         | 0.345        | 0.281        |
| 4-Acetyl-2-methylpyridine                     | C8 H9 N O   | -2.46     | 135.06808 | 1.485  | M+H             | 136.0755 | nd          | nd        | nd           | 0.038         | 0.034        | 0.037        |
| 4-Acetyl-3-methylpyridine                     | C8 H9 N O   | -2.47     | 135.06808 | 8.836  | M+H             | 136.0754 | nd          | nd        | nd           | 0.021         | 0.020        | 0.012        |
| 2-Acetyl-5-methylpyridine                     | C8 H9 N O   | -2.45     | 135.06808 | 10.382 | M+H             | 136.0754 | nd          | nd        | nd           | 0.005         | 0.005        | 0.005        |
| 2-Acetyl-6-methylpyridine                     | C8 H9 N O   | -2.08     | 135.06813 | 9.934  | M+H             | 136.0755 | nd          | nd        | nd           | nd            | 0.004        | nd           |
| Ethyl 2-furanyl diketone                      | C8 H8 O3    | -4.32     | 152.04669 | 6.549  | M-H             | 151.0390 | nd          | nd        | nd           | nd            | 0.056        | 0.064        |
| <b>Total</b>                                  |             |           |           |        |                 |          | <b>nd</b>   | <b>nd</b> | <b>nd</b>    | <b>0.440</b>  | <b>0.507</b> | <b>0.443</b> |
| <b>Organosulfur compounds</b>                 |             |           |           |        |                 |          |             |           |              |               |              |              |

| Compounds                    | Formula                           | Error ppm | MW        | RT    | MS <sup>2</sup> | M/Z      | Postharvest |           |              |               |              |              |
|------------------------------|-----------------------------------|-----------|-----------|-------|-----------------|----------|-------------|-----------|--------------|---------------|--------------|--------------|
|                              |                                   |           |           |       |                 |          | Green beans |           |              | Roasted beans |              |              |
|                              |                                   |           |           |       |                 |          | Natural     | Honey     | Fully washed | Natural       | Honey        | Fully washed |
| Kahweofuran                  | C <sub>5</sub> H <sub>7</sub> N O | 1.25      | 97.05288  | 8.917 | M+H             | 98.0602  | nd          | nd        | nd           | 0.015         | 0.014        | 0.010        |
| 2-Methyl-3-(methylthio)furan | C <sub>6</sub> H <sub>8</sub> O S | -1.41     | 128.02941 | 7.626 | M+H             | 129.0521 | nd          | nd        | nd           | nd            | nd           | 0.003        |
| <b>Total</b>                 |                                   |           |           |       |                 |          | <b>nd</b>   | <b>nd</b> | <b>nd</b>    | <b>0.015</b>  | <b>0.014</b> | <b>0.013</b> |

Description: nd: not detected; MW: molecular weight; RT: Retention time; MS<sup>2</sup>: Mass spectrometry (ion positive and negative); M/Z: mass to charge ratio.

Figure 1 contains VIP-predictive score of compounds identified in green beans and roasted beans. This is used to validate the selected compounds as markers in postharvest processing. Compounds have a score  $VIP > 1.0$  significantly affect the separation/differentiation of postharvest processing.

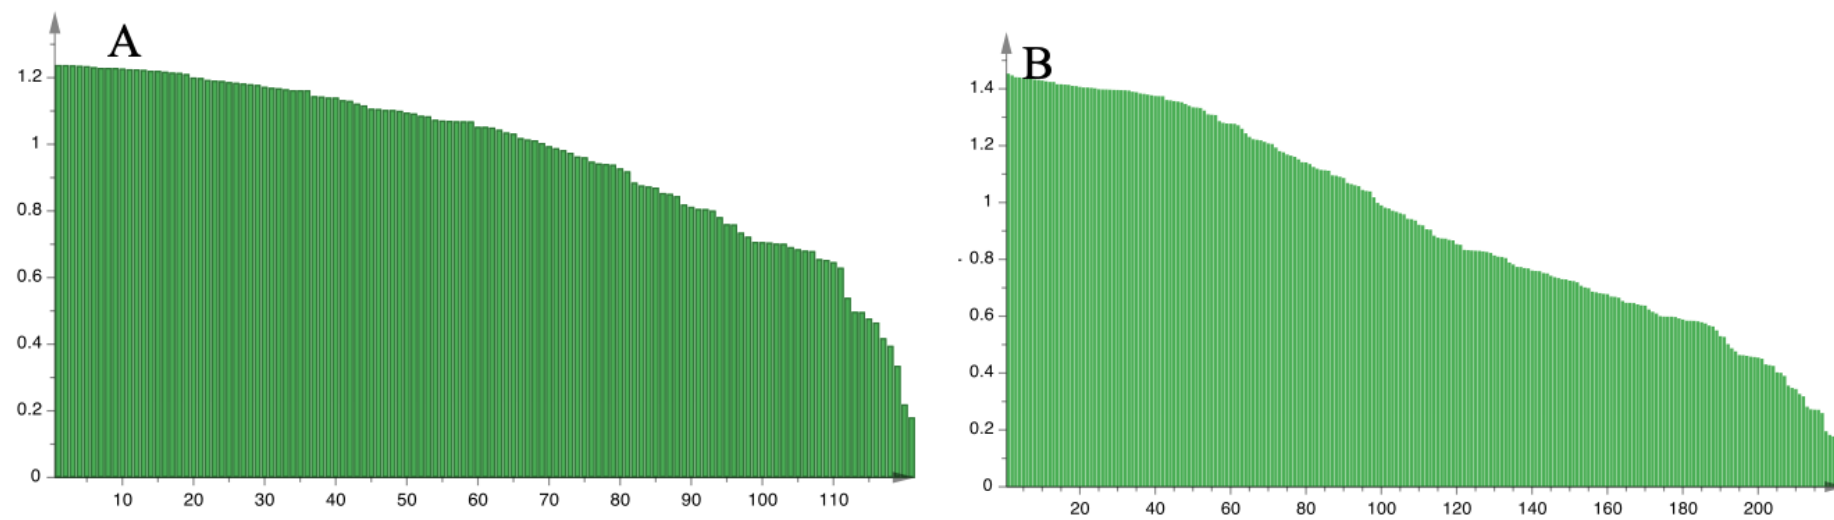

Figure 1. VIP Predictive OPLS-DA modeling of compounds identified in green beans (A) and roasted beans (B)

Figure 2 contains the results of permutation tests on green beans and roasted beans prepared with different postharvest processing. The permutation test was used to validate the feasibility of OPLS-DA modeling in distinguishing postharvest processing applied to Kalosi-Enrekang Arabica coffee.

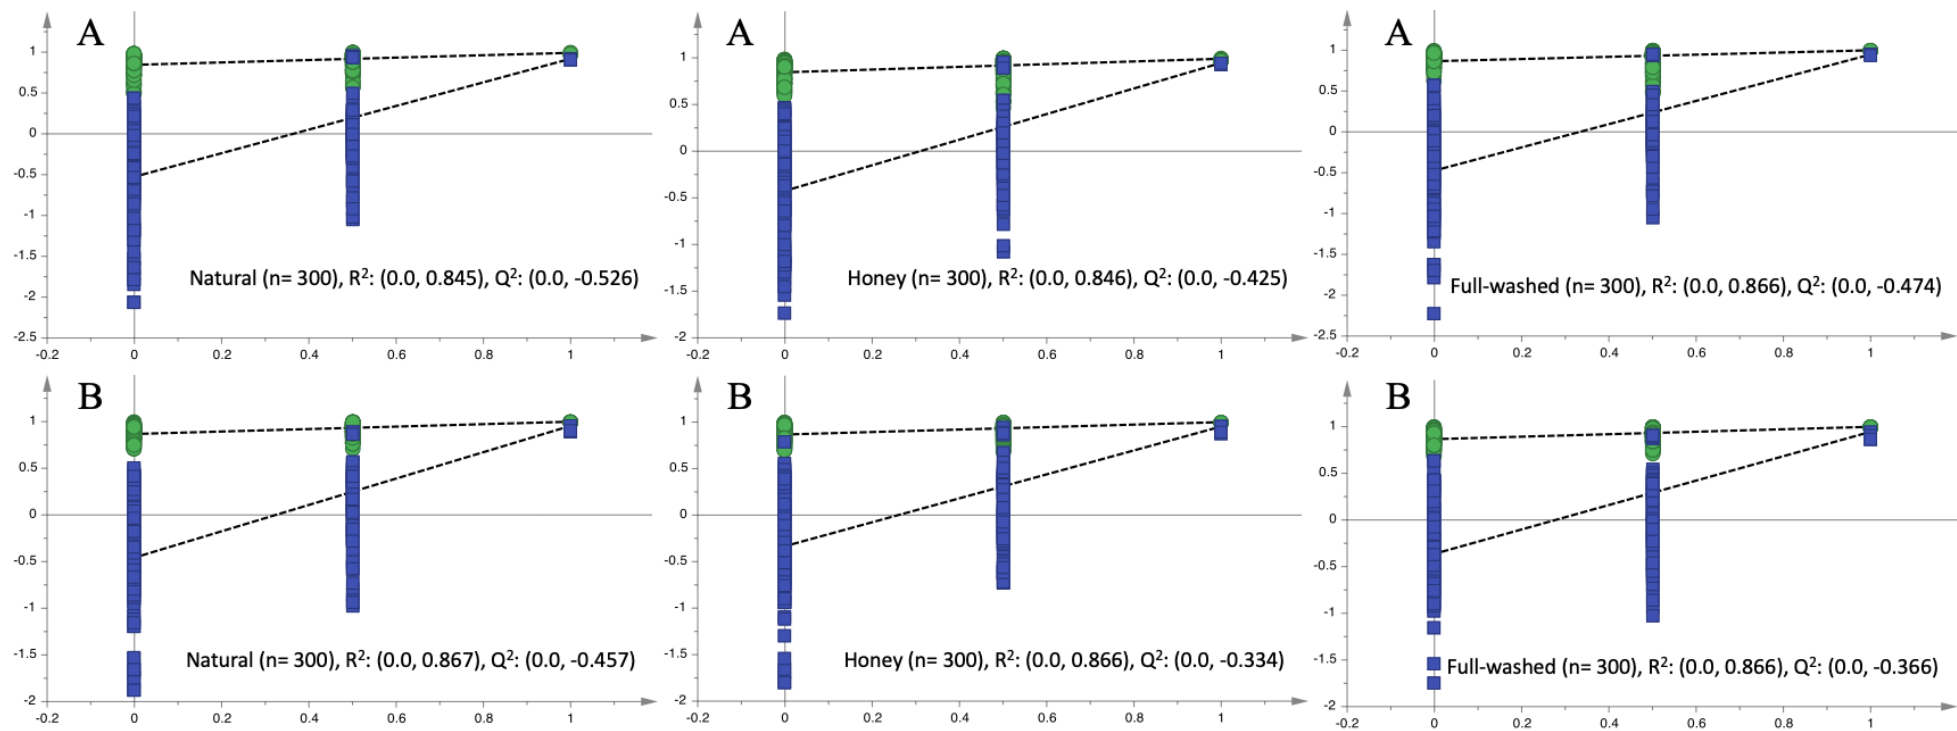

Figure 2. Permutation Test of Green Beans (A) dan Roasted Beans (B)
